# Supplementary material
Source: PubMed Central journal article supplement (PMC2443822)
Supplement: NIHMS49532-supplement-01.pdf [file NIHMS49532-supplement-01.pdf]

**Table S1** Summary of 63 hMLH1 variants

| hMLH1 Variants          | Exon | Nucleotide Change | SIFT Analysis | Interaction <sup>(c)</sup> |       |        | MMR status <sup>(d)</sup> | Reference <sup>(e)</sup>   |
|-------------------------|------|-------------------|---------------|----------------------------|-------|--------|---------------------------|----------------------------|
|                         |      |                   |               | hEXO1                      | hPMS2 | hMRE11 |                           |                            |
| I25F <sup>(a)</sup>     | 1    | A → T             | +             | -                          | -     | -      | -                         | Weber et al. 1999          |
| I25I                    | 1    | T → C             | +             | -                          | -     | -      | +                         | Takahashi et al. 2007      |
| P28L <sup>(a)</sup>     | 1    | C → T             | +             | -                          | -     | -      | -                         | Wehner et al. 1997         |
| I32V <sup>(a)(b)</sup>  | 1    | A → G             | +             | ++                         | ++    | +      | -                         | Kondo et al. 2003          |
| M35R                    | 1    | T → G             | +             | -                          | -     | -      | -                         | Tannergard et al. 1995     |
| S44F                    | 2    | C → T             | +             | -                          | -     | -      | -                         | Bronner et al. 1994        |
| Q62K                    | 2    | C → A             | +             | -                          | -     | -      | -                         | Wijnen et al. 1997         |
| N64S <sup>(a)</sup>     | 2    | A → G             | +             | -                          | -     | -      | -                         | Wijnen et al. 1997         |
| G67R                    | 2    | G → A             | +             | -                          | -     | -      | -                         | Tannergard et al. 1995     |
| I68N                    | 2    | T → A             | +             | -                          | -     | -      | -                         | Tannergard et al. 1995     |
| C77Y <sup>(a)</sup>     | 3    | G → A             | +             | -                          | -     | -      | -                         | Shimodaira et al. 1998     |
| E102K                   | 4    | G → A             | +             | -                          | -     | -      | -                         | Ellison et al. 2001        |
| I107R                   | 4    | T → G             | +             | -                          | -     | -      | -                         | Nystrom-lahti et al. 1996  |
| T117M                   | 4    | C → T             | +             | -                          | -     | -      | -                         | Liu et al. 1996            |
| T117R                   | 4    | C → G             | +             | -                          | -     | -      | -                         | Buerstedde et al. 1995     |
| A128P <sup>(a)</sup>    | 5    | G → C             | +             | -                          | -     | -      | -                         | Pensotti et al. 1997       |
| V185G <sup>(a)</sup>    | 7    | T → G             | +             | -                          | -     | -      | -                         | Kohonen-Corish et al. 1996 |
| E199Q                   | 7    | G → C             | +             | -                          | -     | -      | +                         | Wahlberg et al. 1999       |
| V213M <sup>(a)(b)</sup> | 8    | G → A             | +             | ++                         | ++    | -      | +                         | Fidalgo et al. 2000        |
| R217C <sup>(b)</sup>    | 8    | C → T             | +             | ++                         | ++    | +      | +                         | Miyaki et al. 1995         |
| I219L <sup>(a)(b)</sup> | 8    | A → C             | +             | ++                         | ++    | +      | +                         | Kondo et al. 2003          |
| I219V <sup>(a)(b)</sup> | 8    | A → G             | +             | ++                         | ++    | -      | +                         | Liu et al. 1995            |
| G244D                   | 9    | G → A             | +             | -                          | -     | -      | -                         | Pensotti et al. 1997       |
| I262 del 3bp            | 9    | Del ATC           | +             | -                          | -     | -      | -                         | Hunter et al. 1998         |
| R265C                   | 10   | C → T             | +             | -                          | -     | -      | -                         | Wahlberg et al. 1999       |
| R265H <sup>(a)(b)</sup> | 10   | G → A             | +             | ++                         | ++    | +      | +                         | Viel et al. 1997           |
| V326A <sup>(a)</sup>    | 11   | T → C             | +             | +                          | ++    | +      | -                         | Liu et al. 1996            |
| S406N <sup>(a)(b)</sup> | 12   | G → A             | +             | ++                         | ++    | -      | +                         | Wu et al. 1997             |
| A492I                   | 13   | G → A             | +             | +                          | ++    | +      | -                         | Moslein et al. 1996        |
| 497 ins 1bp             | 13   | Ins C             | +             | -                          | -     | -      | -                         | Moslein et al. 1996        |
| 497 del 1bp             | 13   | Del G             | +             | -                          | -     | -      | -                         | Weber et al. 1997          |
| V506A <sup>(a)</sup>    | 13   | T → C             | +             | -                          | +     | -      | -                         | Liu et al. 1996            |
| 519 ins 1bp             | 13   | Ins T             | +             | -                          | -     | -      | -                         | Kolodner et al. 1995       |
| E523D <sup>(a)</sup>    | 14   | G → T             | +             | -                          | -     | -      | +                         | Sasaki et al. 1996         |
| 541 del 1bp             | 14   | Del C             | +             | -                          | -     | -      | -                         | Lamberti et al. 1999       |
| Q542L                   | 14   | A → T             | +             | ++                         | +     | +      | -                         | Han et al. 1995            |
| L549P <sup>(a)</sup>    | 14   | T → C             | +             | -                          | -     | -      | -                         | Han et al. 1996            |
| N551I <sup>(a)</sup>    | 14   | A → C             | +             | -                          | -     | -      | -                         | Wang et al. 1997           |
| L574P <sup>(a)</sup>    | 15   | T → C             | +             | -                          | -     | -      | -                         | Han et al. 1995            |
| E578G                   | 16   | A → G             | +             | +                          | ++    | ++     | -                         | Tannergard et al. 1995     |
| L582V <sup>(a)</sup>    | 16   | C → G             | +             | +                          | ++    | +      | +                         | Han et al. 1995            |
| 586 ins 1bp             | 16   | Ins C             | +             | -                          | -     | -      | -                         | Han et al. 1995            |
| 590 del 4bp             | 16   | Del TAGA          | +             | -                          | -     | -      | -                         | Moslein et al. 1996        |
| 595 del 2bp             | 16   | Del AG            | +             | -                          | -     | -      | -                         | Wijnen et al. 1996         |
| K616 del 3bp            | 16   | Del AAG           | +             | -                          | +     | -      | -                         | Miyaki et al. 1995         |
| K618A                   | 16   | AA → GC           | +             | +                          | +     | -      | -                         | Mauillon et al. 1996       |
| K618T                   | 16   | A → C             | +             | -                          | ++    | -      | -                         | Han et al. 1995            |
| 632 del 1bp             | 16   | Del G             | +             | -                          | -     | -      | -                         | Buerstedde et al. 1995     |
| L653R                   | 17   | T → G             | +             | -                          | -     | -      | -                         | Takahashi et al. 2007      |
| P654L <sup>(a)</sup>    | 17   | C → T             | +             | -                          | -     | -      | -                         | Raevaara et al. 2005       |
| R659P                   | 17   | G → C             | +             | -                          | -     | -      | -                         | Nystrom-lahti et al. 1996  |
| R659X                   | 17   | C → T             | +             | -                          | -     | -      | -                         | Nystrom-lahti et al. 1996  |
| E663G                   | 17   | A → G             | +             | -                          | -     | +      | +                         | Dieumegard et al. 2000     |
| L676R                   | 18   | T → G             | +             | -                          | -     | -      | -                         | Takahashi et al. 2007      |
| A681T                   | 18   | G → A             | +             | -                          | +     | -      | -                         | Froggatt et al. 1996       |
| W712X                   | 19   | G → A             | +             | -                          | -     | -      | -                         | Liu et al. 1996            |
| W714X                   | 19   | G → A             | +             | -                          | -     | -      | -                         | Hunter et al. 1996         |
| V716M <sup>(a)</sup>    | 19   | G → A             | +             | -                          | -     | -      | -                         | Hunter et al. 1998         |
| H718Y <sup>(b)</sup>    | 19   | C → T             | +             | ++                         | ++    | -      | -                         | Weber et al. 1999          |
| 726 del 4bp             | 19   | Del CACA          | +             | -                          | -     | -      | -                         | Papadopoulos et al. 1994   |
| L729V <sup>(a)(b)</sup> | 19   | C → G             | +             | ++                         | ++    | +      | +                         | Kondo et al. 2003          |
| 733 ins 4bp             | 19   | Ins AAAC          | +             | -                          | -     | -      | -                         | Risinger et al. 1996       |
| 756 ins 4bp             | 19   | Ins TGTT          | +             | -                          | -     | -      | -                         | Papadopoulos et al. 1994   |

The information of hMLH1 variants was compiled from various databases ([www.insight-group.org](http://www.insight-group.org)) and studies referenced above. hMLH1 HNPCC variants: (a) no change of charge or polarity; (b) polymorphism; (c) Kondo et al., 2003 (relative protein interaction strength categorized into three groups: “-”, <25%; “+”, 25%-75%; “++”, > 75%); (d) Takahashi et al., 2007 (“+”, variants show dominant mutator effect by three reporter genes and possessed > 60% MMR activity as suggested by the authors); (e) see supplemental references. SIFT prediction: “+” sign indicates that the amino acid change could affect protein function ([blocks.fhcrc.org](http://blocks.fhcrc.org); Ng and Henikoff, 2003). The relative hMRE11-hMLH1 interactions were analyzed in the present study.

**Supplementary Fig. S1**

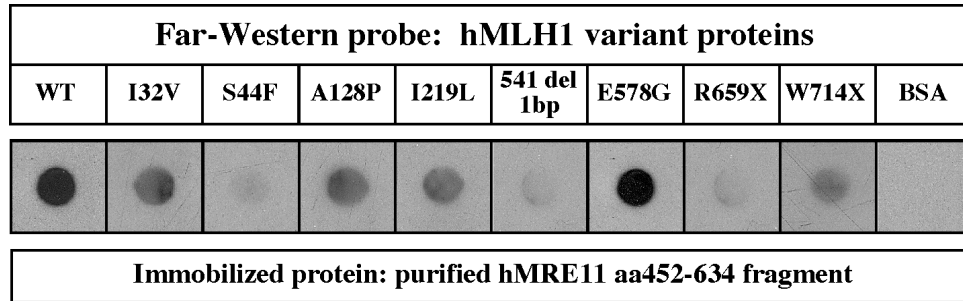

Figure S1. Far-Western analysis of the effects of hMLH1 Lynch syndrome mutations on the interaction between hMRE11 and hMLH1. Membranes that were immobilized with purified hMRE11<sup>452-634</sup> polypeptide and BSA were probed independently with lysates containing wildtype and various hMLH1 mutant proteins. Captured hMLH1 proteins were detected by conventional Western blot analysis.

Supplementary Fig. S2

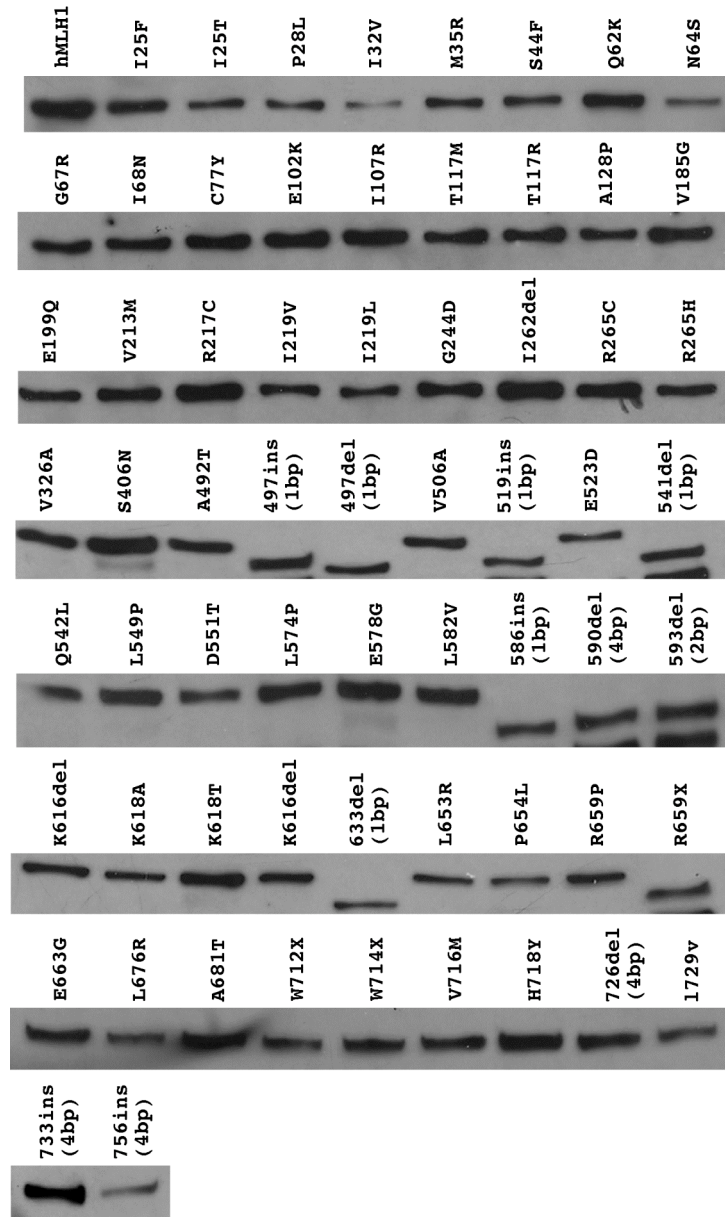

Figure S2. Analysis of the expression of hMLH1 variants in BL21 (DE3) RIL cells by immunoblots. Wildtype and mutant hMLH1 proteins were expressed from pET-28a bacterial expression constructs that harbored full-length hMLH1 cDNA sequences encoding relevant hMLH1 mutants.

### **Additional references:**

1. Bronner C.E., Baker S.M., Morrison P.T., Warren G., Smith L.G., Lescoe M.K., Kane M., Earabino C., Lipford J., Lindblom A., et al. (1994) *Nature* 368, 258-261
2. Buerstedde J. M., Alday P., Torhorst J., Weber W., Muller H., and Scott R. (1995) *J Med Genet.* 32, 909-912
3. Dieumegard B., Grandjouan S., Sabourin J. C., Le Bihan M. L., Lefrere I., Bellefqih, Pignon J. P., Rougier P., Lasser P., Benard J., Couturier D., and Bressac-de Paillerets B. (2000) *Br J Cancer.* 82, 871-880
4. Ellison A. R., Lofing J., and Bitter G. A. (2001) *Hum Mol Genet.* 10, 1889-1900
5. Fidalgo P., Almeida M. R., West S., Gaspar C., Maia L., Wijnen J., Albuquerque C., Curtis A., Cravo M., Fodde R., Leitao C. N., and Burn J. (2000) *Eur J Hum Genet.* 8, 49-53
6. Froggatt N. J., Brassett C., Koch D. J., Evans D. G., Hodgson S. V., Ponder B. A., and Maher E. R. (1996) *J Med Genet.* 33, 726-730
7. Han H. J., Yuan Y., Ku J. L., Oh J. H., Won Y. J., Kang K. J., Kim K. Y., Kim S., Kim C. Y., Kim J. P., Oh NG, Lee K. H., Choe K. J., Nakamura Y., and Park J. G. (1996) *J Natl Cancer Inst.* 88, 1317-1319
8. Hutter P., Couturier A., Membrez V., Joris F., Sappino A. P., Chappuis P. O. (1998) *Int J Cancer.* 78, 680-684
9. Hutter P., Couturier A., Scott R. J., Alday P., Delozier-Blanchet C., Cachat F., Antonarakis S. E., Joris F., Gaudin M., D'Amato L., and Buerstedde J. M. (1996) *J Med Genet.* 33, 636-640
10. Kohonen-Corish M., Ross V. L., Doe W. F., Kool D. A., Edkins E., Faragher I., Wijnen J., Khan P. M., Macrae F., and St John D. J. (1996) *Am J Hum Genet.* 59, 818-824
11. Kolodner R. D., Hall N. R., Lipford J., Kane M. F., Morrison P. T., Finan P. J., Burn J., Chapman P., Earabino C., and Merchant E. (1995) *Cancer Res.* 55, 242-248
12. Kolodner R. D., Hall N. R., Lipford J., Kane M. F., Rao M. R., Morrison P., Wirth L., Finan P.J., Burn J., and Chapman P. (1994) *Genomics.* 24, 516-526
13. Han H. J., Maruyama M., Baba S., Park J. G., and Nakamura Y. (1995) *Hum Mol Genet.* 4, 237-242

14. Lamberti C., Kruse R., Ruelfs C., Caspari R., Wang Y., Jungck M., Mathiak M., Malayeri H. R., Friedl W., Sauerbruch T., and Propping P. (1999) *Gut*. 44, 839-843
15. Liu B., Nicolaides N. C., Markowitz S., Willson J. K., Parsons R. E., Jen J., Papadopoulos N., Peltomäki P., de la Chapelle A., and Hamilton S. R. (1995) *Nat Genet*. 9, 48-55
16. Liu B., Parsons R., Papadopoulos N., Nicolaides N. C., Lynch H. T., Watson P., Jass J. R., Dunlop M., Wyllie A., Peltomäki P., de la Chapelle A., Hamilton S. R., Vogelstein B., and Kinzler K. W. (1996) *Nat Med*. 2, 169-174
17. Miyaki M., Konishi M., Muraoka M., Kikuchi-Yanoshita R., Tanaka K., Iwama T., Mori T., Koike M., Ushio K., and Chiba M. (1995) *J Mol Med*. 73, 515-520
18. Moslein G., Tester D. J., Lindor N. M., Honchel R., Cunningham J. M., French A. J., Halling KC, Schwab M., Goretzki P., and Thibodeau S. N. (1996) *Hum Mol Genet*. 5, 1245-1252
19. Nyström-Lahti M., Wu Y., Moisio A. L., Hofstra R. M., Osinga J., Mecklin J. P., Järvinen H. J., Leisti J., Buys C.H., de la Chapelle A., and Peltomäki P. (1996) *Hum Mol Genet*. 5, 763-769
20. Papadopoulos N., Nicolaides N. C., Wei Y. F., Ruben S. M., Carter K. C., Rosen C. A., Haseltine W. A., Fleischmann R. D., Fraser C. M., and Adams M. D. (1994) *Science* 263, 1625-1629
21. Pensotti V., Radice P., Presciuttini S., Calistri D., Gazzoli I., Grimalt Perez A., Mondini P., Buonsanti G., Sala P., Rossetti C., Ranzani G. N., Bertario L., and Pierotti M. A. (1997) *Gene Chromosome Canc*. 19, 135-142
22. Rævaara T. E., Korhonen M. K., Lohi H., Hampel H., Lynch E., Lonnqvist K. E., Holinski-Feder E., Sutter C., McKinnon W., Duraisamy S., Gerdes A. M., Peltomäki P., Kohonen-Ccorish M., Mangold E., Macrae F., Greenblatt M., de la Chapelle A., and Nystrom M. (2005) *Gastroenterology*. 129, 537-549
23. Risinger J. I., Barrett J. C., Watson P., and Lynch H. T. Boyd J. (1996) *Cancer*. 77, 1836-1843
24. Sasaki S., Horii A., Shimada M., Han H. J., Yanagisawa A., Muto T., and Nakamura Y. (1996) *Hum Mutat*. 7, 275-278
25. Tannergard P., Lipford J. R., Kolodner R., Frodin J. E., Nordenskjold M., and Lindblom A. (1995) *Cancer Res*. 55, 6092-6096
26. Viel A., Genuardi M., Capozzi E., Leonardi F., Bellacosa A., Paravatou-Petsotas M.,

- Pomponi M. G., Fornasarig M., Percesepe A., Roncucci L., Tamassia M. G., Benatti P., Ponz de Leon M., Valenti A., Covino M., Anti M., Foletto M., Boiocchi M., and Neri G. (1997) *Gene Chromosome Canc.* 18, 8-18
27. Wahlberg S., Liu T., Lindblom P., and Lindblom A. (1999) *Genet Test.* 3, 259-264
  28. Wang Q., Desseigne F., Lasset C., Saurin J. C., Navarro C., Yagci T., Keser I., Bagci H., Luleci G., Gelen T., Chayvialle J. A., Puisieux A., and Ozturk M. (1997) *Int J Cancer.* 73, 831-836
  29. Weber T.K., Conlon W., Petrelli N.J., Rodriguez-Bigas M., Keitz B., Pazik J., Farrell C., O'Malley L., Osholim M., Abdo M., Anderson G., Stoler D., Yandell D. (1997) *Cancer Res.* 57, 3798-3803.
  30. Weber T. K., Chin H. M., Rodriguez-Bigas M., Keitz B., Gilligan R., O'Malley L., Urf E., Diba N., Pazik J., and Petrelli N. J. (1999) *JAMA.* 281, 2316-2320.
  31. Wehner M., Buschhausen L., Lamberti C., Kruse R., Caspari R., Propping P., and Friedl W. (1997) *Hum Mutat.* 10, 241-244
  32. Wijnen J., Khan P. M., Vasen H., Menko F., van der Klift H., van den Broek M., van Leeuwen-Cornelisse I., Nagengast F., Meijers-Heijboer E. J., Lindhout D., Griffioen G., Cats A., Kleibeuker J., Varesco L., Bertario L., Bisgaard M. L., Mohr J., Kolodner R., and Fodde R. (1996) *Am J Hum Genet.* 58, 300-307
  33. Wijnen J, Khan PM, Vasen H, van der Klift H, Mulder A, van Leeuwen-Cornelisse I, Bakker B, Losekoot M, Moller P, and Fodde R. (1997) *Am J Hum Genet.* 61, 329-335
  34. Wu Y., Nystrom-Lahti M., Osinga J., Looman M.W., Peltomaki P., Aaltonen L.A., de la Chapelle A., Hofstra R.M., Buys C.H. (1997) *Genes Chromosomes Cancer* 18, 269-278.
